# Supplementary material for: Association of RASSF1A, DCR2, and CASP8 Methylation with Survival in Neuroblastoma: A Pooled Analysis Using Reconstructed Individual Patient Data
Source: Hindawi journal article supplement (doi:10.1155/2020/7390473), 2020-01-01
Supplement: f1 [file 7390473.f1.pdf]

| ID   | Time   | Status | Arm          | Paper (PMID) | Gene   |
|------|--------|--------|--------------|--------------|--------|
| 1106 | 0.0721 | 1      | Methylated   | 17545522     | CASP8  |
| 1103 | 0.0734 | 1      | Methylated   | 17545522     | DCR2   |
| 280  | 0.08   | 1      | Methylated   | 17545522     | CASP8  |
| 1100 | 0.089  | 1      | Methylated   | 23619990     | CASP8  |
| 270  | 0.102  | 1      | Methylated   | 15623630     | RASSF1 |
| 1105 | 0.102  | 1      | Methylated   | 15623630     | RASSF1 |
| 250  | 0.135  | 1      | Methylated   | 17545522     | DCR2   |
| 123  | 0.18   | 1      | Unmethylated | 23619990     | CASP8  |
| 210  | 0.18   | 1      | Unmethylated | 23619990     | CASP8  |
| 1108 | 0.236  | 1      | Unmethylated | 17570703     | CASP8  |
| 2100 | 0.236  | 1      | Unmethylated | 17570703     | CASP8  |
| 1109 | 0.267  | 1      | Methylated   | 17570703     | RASSF1 |
| 140  | 0.321  | 1      | Methylated   | 17570703     | CASP8  |
| 220  | 0.321  | 1      | Methylated   | 17570703     | CASP8  |
| 347  | 0.344  | 1      | Methylated   | 17570703     | RASSF1 |
| 2101 | 0.344  | 1      | Methylated   | 17570703     | RASSF1 |
| 336  | 0.384  | 1      | Methylated   | 17545522     | CASP8  |
| 1    | 0.39   | 1      | Unmethylated | 23619990     | CASP8  |
| 2    | 0.39   | 1      | Unmethylated | 23619990     | CASP8  |
| 3    | 0.39   | 1      | Unmethylated | 23619990     | CASP8  |
| 4    | 0.39   | 1      | Unmethylated | 23619990     | CASP8  |
| 5    | 0.39   | 1      | Unmethylated | 23619990     | CASP8  |
| 310  | 0.45   | 1      | Unmethylated | 23619990     | CASP8  |
| 410  | 0.45   | 1      | Unmethylated | 23619990     | CASP8  |
| 1107 | 0.489  | 1      | Unmethylated | 17545522     | DCR2   |
| 334  | 0.564  | 1      | Methylated   | 15623630     | RASSF1 |
| 330  | 0.576  | 1      | Methylated   | 17545522     | DCR2   |
| 434  | 0.589  | 1      | Methylated   | 17545522     | CASP8  |
| 240  | 0.63   | 1      | Methylated   | 23619990     | CASP8  |
| 328  | 0.63   | 1      | Methylated   | 23619990     | CASP8  |
| 149  | 0.714  | 1      | Methylated   | 18980997     | DCR2   |
| 160  | 0.72   | 1      | Methylated   | 23619990     | CASP8  |
| 319  | 0.743  | 1      | Methylated   | 17570703     | CASP8  |
| 437  | 0.744  | 1      | Methylated   | 17570703     | RASSF1 |
| 260  | 0.823  | 1      | Methylated   | 21104989     | CASP8  |
| 1104 | 0.823  | 1      | Methylated   | 21104989     | CASP8  |
| 1135 | 0.857  | 1      | Unmethylated | 18980997     | DCR2   |
| 6    | 0.86   | 1      | Unmethylated | 23619990     | CASP8  |
| 433  | 0.871  | 1      | Methylated   | 15623630     | RASSF1 |
| 535  | 0.897  | 1      | Methylated   | 17570703     | RASSF1 |
| 229  | 0.92   | 1      | Methylated   | 23619990     | CASP8  |
| 7    | 0.92   | 1      | Unmethylated | 23619990     | CASP8  |
| 8    | 0.92   | 1      | Unmethylated | 23619990     | CASP8  |
| 530  | 0.973  | 1      | Methylated   | 15623630     | RASSF1 |
| 419  | 0.98   | 1      | Methylated   | 17570703     | CASP8  |
| 324  | 0.99   | 1      | Methylated   | 23619990     | CASP8  |

|      |      |                |                 |
|------|------|----------------|-----------------|
| 424  | 0.99 | 1 Methylated   | 23619990 CASP8  |
| 225  | 1    | 1 Methylated   | 18980997 DCR2   |
| 634  | 1.01 | 1 Methylated   | 17570703 RASSF1 |
| 629  | 1.02 | 1 Methylated   | 15623630 RASSF1 |
| 519  | 1.06 | 1 Methylated   | 17570703 CASP8  |
| 532  | 1.07 | 1 Methylated   | 17545522 CASP8  |
| 429  | 1.07 | 1 Methylated   | 17545522 DCR2   |
| 618  | 1.08 | 1 Methylated   | 17570703 CASP8  |
| 427  | 1.1  | 1 Methylated   | 23619990 CASP8  |
| 9    | 1.1  | 1 Unmethylated | 23619990 CASP8  |
| 510  | 1.1  | 1 Unmethylated | 23619990 CASP8  |
| 610  | 1.1  | 1 Unmethylated | 23619990 CASP8  |
| 718  | 1.11 | 1 Methylated   | 17570703 CASP8  |
| 729  | 1.13 | 1 Methylated   | 15623630 RASSF1 |
| 734  | 1.18 | 1 Methylated   | 17570703 RASSF1 |
| 834  | 1.18 | 1 Methylated   | 17570703 RASSF1 |
| 523  | 1.2  | 1 Methylated   | 23619990 CASP8  |
| 320  | 1.21 | 1 Methylated   | 18980997 DCR2   |
| 340  | 1.23 | 1 Unmethylated | 17570703 CASP8  |
| 436  | 1.23 | 1 Unmethylated | 17570703 CASP8  |
| 818  | 1.25 | 1 Methylated   | 17570703 CASP8  |
| 934  | 1.26 | 1 Methylated   | 17570703 RASSF1 |
| 1034 | 1.26 | 1 Methylated   | 17570703 RASSF1 |
| 1134 | 1.28 | 1 Methylated   | 17570703 RASSF1 |
| 526  | 1.3  | 1 Methylated   | 23619990 CASP8  |
| 534  | 1.32 | 1 Unmethylated | 17570703 CASP8  |
| 829  | 1.33 | 1 Methylated   | 15623630 RASSF1 |
| 333  | 1.33 | 1 Methylated   | 21104989 CASP8  |
| 1228 | 1.34 | 1 Methylated   | 17570703 RASSF1 |
| 1324 | 1.34 | 1 Methylated   | 17570703 RASSF1 |
| 420  | 1.36 | 1 Methylated   | 18980997 DCR2   |
| 349  | 1.36 | 1 Unmethylated | 18980997 DCR2   |
| 2102 | 1.36 | 1 Unmethylated | 18980997 DCR2   |
| 633  | 1.4  | 1 Unmethylated | 17570703 CASP8  |
| 733  | 1.4  | 1 Unmethylated | 17570703 CASP8  |
| 622  | 1.4  | 1 Methylated   | 23619990 CASP8  |
| 10   | 1.4  | 1 Unmethylated | 23619990 CASP8  |
| 1423 | 1.43 | 1 Methylated   | 17570703 RASSF1 |
| 439  | 1.43 | 1 Unmethylated | 18980997 DCR2   |
| 929  | 1.49 | 1 Methylated   | 15623630 RASSF1 |
| 833  | 1.49 | 1 Unmethylated | 17570703 CASP8  |
| 933  | 1.49 | 1 Unmethylated | 17570703 CASP8  |
| 537  | 1.5  | 1 Unmethylated | 18980997 DCR2   |
| 1522 | 1.53 | 1 Methylated   | 17570703 RASSF1 |
| 1622 | 1.53 | 1 Methylated   | 17570703 RASSF1 |
| 1029 | 1.54 | 1 Methylated   | 15623630 RASSF1 |
| 127  | 1.54 | 1 Unmethylated | 15623630 RASSF1 |

|      |      |                |                 |
|------|------|----------------|-----------------|
| 635  | 1.57 | 1 Unmethylated | 18980997 DCR2   |
| 625  | 1.6  | 1 Methylated   | 23619990 CASP8  |
| 725  | 1.6  | 1 Methylated   | 23619990 CASP8  |
| 11   | 1.6  | 1 Unmethylated | 23619990 CASP8  |
| 12   | 1.6  | 1 Unmethylated | 23619990 CASP8  |
| 13   | 1.6  | 1 Unmethylated | 23619990 CASP8  |
| 14   | 1.6  | 1 Unmethylated | 23619990 CASP8  |
| 1129 | 1.64 | 1 Methylated   | 15623630 RASSF1 |
| 630  | 1.65 | 1 Methylated   | 17545522 CASP8  |
| 528  | 1.65 | 1 Methylated   | 17545522 DCR2   |
| 825  | 1.7  | 1 Methylated   | 23619990 CASP8  |
| 710  | 1.7  | 1 Unmethylated | 23619990 CASP8  |
| 735  | 1.71 | 1 Unmethylated | 18980997 DCR2   |
| 722  | 1.8  | 1 Methylated   | 23619990 CASP8  |
| 170  | 1.81 | 1 Unmethylated | 21104989 CASP8  |
| 822  | 2    | 1 Methylated   | 23619990 CASP8  |
| 15   | 2    | 1 Unmethylated | 23619990 CASP8  |
| 16   | 2    | 1 Unmethylated | 23619990 CASP8  |
| 810  | 2    | 1 Unmethylated | 23619990 CASP8  |
| 910  | 2    | 1 Unmethylated | 23619990 CASP8  |
| 1010 | 2    | 1 Unmethylated | 23619990 CASP8  |
| 1224 | 2.05 | 1 Methylated   | 15623630 RASSF1 |
| 430  | 2.07 | 1 Methylated   | 21104989 CASP8  |
| 922  | 2.1  | 1 Methylated   | 23619990 CASP8  |
| 925  | 2.2  | 1 Methylated   | 23619990 CASP8  |
| 1022 | 2.2  | 1 Methylated   | 23619990 CASP8  |
| 1025 | 2.2  | 1 Methylated   | 23619990 CASP8  |
| 17   | 2.4  | 1 Unmethylated | 23619990 CASP8  |
| 627  | 2.69 | 1 Methylated   | 17545522 DCR2   |
| 727  | 2.69 | 1 Methylated   | 17545522 DCR2   |
| 730  | 2.7  | 1 Methylated   | 17545522 CASP8  |
| 830  | 2.7  | 1 Methylated   | 17545522 CASP8  |
| 1320 | 2.72 | 1 Methylated   | 15623630 RASSF1 |
| 520  | 2.79 | 1 Methylated   | 18980997 DCR2   |
| 529  | 2.89 | 1 Methylated   | 21104989 CASP8  |
| 1125 | 2.9  | 1 Methylated   | 23619990 CASP8  |
| 1220 | 2.9  | 1 Methylated   | 23619990 CASP8  |
| 628  | 2.97 | 1 Methylated   | 21104989 CASP8  |
| 728  | 2.97 | 1 Methylated   | 21104989 CASP8  |
| 619  | 3    | 1 Methylated   | 18980997 DCR2   |
| 18   | 3    | 1 Unmethylated | 23619990 CASP8  |
| 1122 | 3.2  | 1 Methylated   | 23619990 CASP8  |
| 1217 | 3.2  | 1 Methylated   | 23619990 CASP8  |
| 1419 | 3.23 | 1 Methylated   | 15623630 RASSF1 |
| 1316 | 3.3  | 1 Methylated   | 23619990 CASP8  |
| 1415 | 3.3  | 1 Methylated   | 23619990 CASP8  |
| 124  | 3.3  | 1 Unmethylated | 23619990 CASP8  |

|      |      |                |                 |
|------|------|----------------|-----------------|
| 131  | 3.3  | 1 Unmethylated | 23619990 CASP8  |
| 1110 | 3.3  | 1 Unmethylated | 23619990 CASP8  |
| 719  | 3.36 | 1 Methylated   | 18980997 DCR2   |
| 828  | 3.38 | 1 Methylated   | 21104989 CASP8  |
| 918  | 3.4  | 1 Methylated   | 17570703 CASP8  |
| 1018 | 3.4  | 1 Methylated   | 17570703 CASP8  |
| 19   | 3.4  | 1 Unmethylated | 23619990 CASP8  |
| 20   | 3.4  | 1 Unmethylated | 23619990 CASP8  |
| 21   | 3.4  | 1 Unmethylated | 23619990 CASP8  |
| 1721 | 3.42 | 1 Methylated   | 17570703 RASSF1 |
| 835  | 3.5  | 1 Unmethylated | 18980997 DCR2   |
| 1518 | 3.59 | 1 Methylated   | 15623630 RASSF1 |
| 1819 | 3.59 | 1 Methylated   | 17570703 RASSF1 |
| 1918 | 3.59 | 1 Methylated   | 17570703 RASSF1 |
| 141  | 3.6  | 1 Unmethylated | 23619990 CASP8  |
| 151  | 3.6  | 1 Unmethylated | 23619990 CASP8  |
| 161  | 3.6  | 1 Unmethylated | 23619990 CASP8  |
| 22   | 3.7  | 1 Unmethylated | 23619990 CASP8  |
| 930  | 3.74 | 1 Methylated   | 17545522 CASP8  |
| 1030 | 3.74 | 1 Methylated   | 17545522 CASP8  |
| 1130 | 3.74 | 1 Methylated   | 17545522 CASP8  |
| 827  | 3.75 | 1 Methylated   | 17545522 DCR2   |
| 927  | 3.75 | 1 Methylated   | 17545522 DCR2   |
| 1313 | 3.8  | 1 Methylated   | 23619990 CASP8  |
| 1412 | 3.8  | 1 Methylated   | 23619990 CASP8  |
| 1618 | 4.05 | 1 Methylated   | 15623630 RASSF1 |
| 309  | 4.23 | 0 Methylated   | 17545522 CASP8  |
| 337  | 4.23 | 0 Methylated   | 17545522 CASP8  |
| 344  | 4.23 | 0 Methylated   | 17545522 CASP8  |
| 354  | 4.23 | 0 Methylated   | 17545522 CASP8  |
| 364  | 4.23 | 0 Methylated   | 17545522 CASP8  |
| 374  | 4.23 | 0 Methylated   | 17545522 CASP8  |
| 384  | 4.23 | 0 Methylated   | 17545522 CASP8  |
| 394  | 4.23 | 0 Methylated   | 17545522 CASP8  |
| 1225 | 4.23 | 0 Methylated   | 17545522 CASP8  |
| 1321 | 4.23 | 0 Methylated   | 17545522 CASP8  |
| 1420 | 4.23 | 0 Methylated   | 17545522 CASP8  |
| 1519 | 4.23 | 0 Methylated   | 17545522 CASP8  |
| 1619 | 4.23 | 0 Methylated   | 17545522 CASP8  |
| 1718 | 4.23 | 0 Methylated   | 17545522 CASP8  |
| 1816 | 4.23 | 0 Methylated   | 17545522 CASP8  |
| 1915 | 4.23 | 0 Methylated   | 17545522 CASP8  |
| 2015 | 4.23 | 0 Methylated   | 17545522 CASP8  |
| 2121 | 4.23 | 0 Methylated   | 17545522 CASP8  |
| 2218 | 4.23 | 0 Methylated   | 17545522 CASP8  |
| 2316 | 4.23 | 0 Methylated   | 17545522 CASP8  |
| 2414 | 4.23 | 0 Methylated   | 17545522 CASP8  |

|      |      |                |                |
|------|------|----------------|----------------|
| 2512 | 4.23 | 0 Methylated   | 17545522 CASP8 |
| 2611 | 4.23 | 0 Methylated   | 17545522 CASP8 |
| 2710 | 4.23 | 0 Methylated   | 17545522 CASP8 |
| 2810 | 4.23 | 0 Methylated   | 17545522 CASP8 |
| 2910 | 4.23 | 0 Methylated   | 17545522 CASP8 |
| 3114 | 4.23 | 0 Methylated   | 17545522 CASP8 |
| 3211 | 4.23 | 0 Methylated   | 17545522 CASP8 |
| 1514 | 4.3  | 1 Methylated   | 23619990 CASP8 |
| 1614 | 4.3  | 1 Methylated   | 23619990 CASP8 |
| 171  | 4.3  | 1 Unmethylated | 23619990 CASP8 |
| 181  | 4.3  | 1 Unmethylated | 23619990 CASP8 |
| 191  | 4.3  | 1 Unmethylated | 23619990 CASP8 |
| 201  | 4.3  | 1 Unmethylated | 23619990 CASP8 |
| 211  | 4.3  | 1 Unmethylated | 23619990 CASP8 |
| 819  | 4.43 | 1 Methylated   | 18980997 DCR2  |
| 259  | 4.48 | 0 Methylated   | 17545522 DCR2  |
| 268  | 4.48 | 0 Methylated   | 17545522 DCR2  |
| 277  | 4.48 | 0 Methylated   | 17545522 DCR2  |
| 287  | 4.48 | 0 Methylated   | 17545522 DCR2  |
| 297  | 4.48 | 0 Methylated   | 17545522 DCR2  |
| 306  | 4.48 | 0 Methylated   | 17545522 DCR2  |
| 1027 | 4.48 | 0 Methylated   | 17545522 DCR2  |
| 1127 | 4.48 | 0 Methylated   | 17545522 DCR2  |
| 1222 | 4.48 | 0 Methylated   | 17545522 DCR2  |
| 1318 | 4.48 | 0 Methylated   | 17545522 DCR2  |
| 1417 | 4.48 | 0 Methylated   | 17545522 DCR2  |
| 1516 | 4.48 | 0 Methylated   | 17545522 DCR2  |
| 1616 | 4.48 | 0 Methylated   | 17545522 DCR2  |
| 1715 | 4.48 | 0 Methylated   | 17545522 DCR2  |
| 1813 | 4.48 | 0 Methylated   | 17545522 DCR2  |
| 1912 | 4.48 | 0 Methylated   | 17545522 DCR2  |
| 2012 | 4.48 | 0 Methylated   | 17545522 DCR2  |
| 2118 | 4.48 | 0 Methylated   | 17545522 DCR2  |
| 2215 | 4.48 | 0 Methylated   | 17545522 DCR2  |
| 2313 | 4.48 | 0 Methylated   | 17545522 DCR2  |
| 2411 | 4.48 | 0 Methylated   | 17545522 DCR2  |
| 3111 | 4.48 | 0 Methylated   | 17545522 DCR2  |
| 290  | 4.48 | 0 Unmethylated | 17545522 DCR2  |
| 338  | 4.48 | 0 Unmethylated | 17545522 DCR2  |
| 339  | 4.48 | 0 Unmethylated | 17545522 DCR2  |
| 345  | 4.48 | 0 Unmethylated | 17545522 DCR2  |
| 355  | 4.48 | 0 Unmethylated | 17545522 DCR2  |
| 365  | 4.48 | 0 Unmethylated | 17545522 DCR2  |
| 375  | 4.48 | 0 Unmethylated | 17545522 DCR2  |
| 385  | 4.48 | 0 Unmethylated | 17545522 DCR2  |
| 395  | 4.48 | 0 Unmethylated | 17545522 DCR2  |
| 435  | 4.48 | 0 Unmethylated | 17545522 DCR2  |

|      |      |                |                |
|------|------|----------------|----------------|
| 533  | 4.48 | 0 Unmethylated | 17545522 DCR2  |
| 632  | 4.48 | 0 Unmethylated | 17545522 DCR2  |
| 732  | 4.48 | 0 Unmethylated | 17545522 DCR2  |
| 832  | 4.48 | 0 Unmethylated | 17545522 DCR2  |
| 932  | 4.48 | 0 Unmethylated | 17545522 DCR2  |
| 1032 | 4.48 | 0 Unmethylated | 17545522 DCR2  |
| 1132 | 4.48 | 0 Unmethylated | 17545522 DCR2  |
| 1226 | 4.48 | 0 Unmethylated | 17545522 DCR2  |
| 1322 | 4.48 | 0 Unmethylated | 17545522 DCR2  |
| 1421 | 4.48 | 0 Unmethylated | 17545522 DCR2  |
| 1520 | 4.48 | 0 Unmethylated | 17545522 DCR2  |
| 1620 | 4.48 | 0 Unmethylated | 17545522 DCR2  |
| 1719 | 4.48 | 0 Unmethylated | 17545522 DCR2  |
| 1817 | 4.48 | 0 Unmethylated | 17545522 DCR2  |
| 1916 | 4.48 | 0 Unmethylated | 17545522 DCR2  |
| 2016 | 4.48 | 0 Unmethylated | 17545522 DCR2  |
| 2122 | 4.48 | 0 Unmethylated | 17545522 DCR2  |
| 2219 | 4.48 | 0 Unmethylated | 17545522 DCR2  |
| 2317 | 4.48 | 0 Unmethylated | 17545522 DCR2  |
| 2415 | 4.48 | 0 Unmethylated | 17545522 DCR2  |
| 2513 | 4.48 | 0 Unmethylated | 17545522 DCR2  |
| 2612 | 4.48 | 0 Unmethylated | 17545522 DCR2  |
| 2711 | 4.48 | 0 Unmethylated | 17545522 DCR2  |
| 2811 | 4.48 | 0 Unmethylated | 17545522 DCR2  |
| 2911 | 4.48 | 0 Unmethylated | 17545522 DCR2  |
| 3010 | 4.48 | 0 Unmethylated | 17545522 DCR2  |
| 3115 | 4.48 | 0 Unmethylated | 17545522 DCR2  |
| 3212 | 4.48 | 0 Unmethylated | 17545522 DCR2  |
| 249  | 4.49 | 0 Unmethylated | 17545522 CASP8 |
| 258  | 4.49 | 0 Unmethylated | 17545522 CASP8 |
| 267  | 4.49 | 0 Unmethylated | 17545522 CASP8 |
| 276  | 4.49 | 0 Unmethylated | 17545522 CASP8 |
| 286  | 4.49 | 0 Unmethylated | 17545522 CASP8 |
| 296  | 4.49 | 0 Unmethylated | 17545522 CASP8 |
| 305  | 4.49 | 0 Unmethylated | 17545522 CASP8 |
| 329  | 4.49 | 0 Unmethylated | 17545522 CASP8 |
| 428  | 4.49 | 0 Unmethylated | 17545522 CASP8 |
| 527  | 4.49 | 0 Unmethylated | 17545522 CASP8 |
| 626  | 4.49 | 0 Unmethylated | 17545522 CASP8 |
| 726  | 4.49 | 0 Unmethylated | 17545522 CASP8 |
| 826  | 4.49 | 0 Unmethylated | 17545522 CASP8 |
| 926  | 4.49 | 0 Unmethylated | 17545522 CASP8 |
| 1026 | 4.49 | 0 Unmethylated | 17545522 CASP8 |
| 1102 | 4.49 | 0 Unmethylated | 17545522 CASP8 |
| 1126 | 4.49 | 0 Unmethylated | 17545522 CASP8 |
| 1221 | 4.49 | 0 Unmethylated | 17545522 CASP8 |
| 1317 | 4.49 | 0 Unmethylated | 17545522 CASP8 |

|      |      |                |                |
|------|------|----------------|----------------|
| 1416 | 4.49 | 0 Unmethylated | 17545522 CASP8 |
| 1515 | 4.49 | 0 Unmethylated | 17545522 CASP8 |
| 1615 | 4.49 | 0 Unmethylated | 17545522 CASP8 |
| 1714 | 4.49 | 0 Unmethylated | 17545522 CASP8 |
| 1812 | 4.49 | 0 Unmethylated | 17545522 CASP8 |
| 1911 | 4.49 | 0 Unmethylated | 17545522 CASP8 |
| 2011 | 4.49 | 0 Unmethylated | 17545522 CASP8 |
| 2117 | 4.49 | 0 Unmethylated | 17545522 CASP8 |
| 2214 | 4.49 | 0 Unmethylated | 17545522 CASP8 |
| 2312 | 4.49 | 0 Unmethylated | 17545522 CASP8 |
| 2410 | 4.49 | 0 Unmethylated | 17545522 CASP8 |
| 3110 | 4.49 | 0 Unmethylated | 17545522 CASP8 |
| 919  | 4.5  | 1 Methylated   | 18980997 DCR2  |
| 1713 | 4.6  | 1 Methylated   | 23619990 CASP8 |
| 928  | 4.7  | 1 Methylated   | 21104989 CASP8 |
| 1019 | 4.79 | 1 Methylated   | 18980997 DCR2  |
| 935  | 4.86 | 1 Unmethylated | 18980997 DCR2  |
| 221  | 5.1  | 1 Unmethylated | 23619990 CASP8 |
| 1119 | 5.14 | 1 Methylated   | 18980997 DCR2  |
| 1511 | 5.4  | 1 Methylated   | 23619990 CASP8 |
| 1611 | 5.4  | 1 Methylated   | 23619990 CASP8 |
| 1710 | 5.4  | 1 Methylated   | 23619990 CASP8 |
| 1811 | 5.4  | 1 Methylated   | 23619990 CASP8 |
| 188  | 5.6  | 1 Methylated   | 23619990 CASP8 |
| 197  | 6.5  | 0 Methylated   | 23619990 CASP8 |
| 207  | 6.5  | 0 Methylated   | 23619990 CASP8 |
| 236  | 6.5  | 0 Methylated   | 23619990 CASP8 |
| 245  | 6.5  | 0 Methylated   | 23619990 CASP8 |
| 254  | 6.5  | 0 Methylated   | 23619990 CASP8 |
| 263  | 6.5  | 0 Methylated   | 23619990 CASP8 |
| 2113 | 6.5  | 0 Methylated   | 23619990 CASP8 |
| 2210 | 6.5  | 0 Methylated   | 23619990 CASP8 |
| 1028 | 6.51 | 1 Methylated   | 21104989 CASP8 |
| 1128 | 6.51 | 1 Methylated   | 21104989 CASP8 |
| 148  | 6.54 | 0 Methylated   | 17570703 CASP8 |
| 158  | 6.54 | 0 Methylated   | 17570703 CASP8 |
| 168  | 6.54 | 0 Methylated   | 17570703 CASP8 |
| 177  | 6.54 | 0 Methylated   | 17570703 CASP8 |
| 185  | 6.54 | 0 Methylated   | 17570703 CASP8 |
| 194  | 6.54 | 0 Methylated   | 17570703 CASP8 |
| 204  | 6.54 | 0 Methylated   | 17570703 CASP8 |
| 224  | 6.54 | 0 Methylated   | 17570703 CASP8 |
| 233  | 6.54 | 0 Methylated   | 17570703 CASP8 |
| 1118 | 6.54 | 0 Methylated   | 17570703 CASP8 |
| 1214 | 6.54 | 0 Methylated   | 17570703 CASP8 |
| 1310 | 6.54 | 0 Methylated   | 17570703 CASP8 |
| 2110 | 6.54 | 0 Methylated   | 17570703 CASP8 |

|      |      |                |                 |
|------|------|----------------|-----------------|
| 346  | 6.54 | 0 Unmethylated | 17570703 CASP8  |
| 356  | 6.54 | 0 Unmethylated | 17570703 CASP8  |
| 366  | 6.54 | 0 Unmethylated | 17570703 CASP8  |
| 376  | 6.54 | 0 Unmethylated | 17570703 CASP8  |
| 386  | 6.54 | 0 Unmethylated | 17570703 CASP8  |
| 396  | 6.54 | 0 Unmethylated | 17570703 CASP8  |
| 1033 | 6.54 | 0 Unmethylated | 17570703 CASP8  |
| 1133 | 6.54 | 0 Unmethylated | 17570703 CASP8  |
| 1227 | 6.54 | 0 Unmethylated | 17570703 CASP8  |
| 1323 | 6.54 | 0 Unmethylated | 17570703 CASP8  |
| 1422 | 6.54 | 0 Unmethylated | 17570703 CASP8  |
| 1521 | 6.54 | 0 Unmethylated | 17570703 CASP8  |
| 1621 | 6.54 | 0 Unmethylated | 17570703 CASP8  |
| 1720 | 6.54 | 0 Unmethylated | 17570703 CASP8  |
| 1818 | 6.54 | 0 Unmethylated | 17570703 CASP8  |
| 1917 | 6.54 | 0 Unmethylated | 17570703 CASP8  |
| 2017 | 6.54 | 0 Unmethylated | 17570703 CASP8  |
| 2123 | 6.54 | 0 Unmethylated | 17570703 CASP8  |
| 2220 | 6.54 | 0 Unmethylated | 17570703 CASP8  |
| 2318 | 6.54 | 0 Unmethylated | 17570703 CASP8  |
| 2416 | 6.54 | 0 Unmethylated | 17570703 CASP8  |
| 2514 | 6.54 | 0 Unmethylated | 17570703 CASP8  |
| 2613 | 6.54 | 0 Unmethylated | 17570703 CASP8  |
| 2712 | 6.54 | 0 Unmethylated | 17570703 CASP8  |
| 2812 | 6.54 | 0 Unmethylated | 17570703 CASP8  |
| 2912 | 6.54 | 0 Unmethylated | 17570703 CASP8  |
| 3011 | 6.54 | 0 Unmethylated | 17570703 CASP8  |
| 3116 | 6.54 | 0 Unmethylated | 17570703 CASP8  |
| 3213 | 6.54 | 0 Unmethylated | 17570703 CASP8  |
| 3310 | 6.54 | 0 Unmethylated | 17570703 CASP8  |
| 1717 | 7.27 | 1 Methylated   | 15623630 RASSF1 |
| 1815 | 7.74 | 1 Methylated   | 15623630 RASSF1 |
| 23   | 7.8  | 0 Unmethylated | 23619990 CASP8  |
| 24   | 7.8  | 0 Unmethylated | 23619990 CASP8  |
| 25   | 7.8  | 0 Unmethylated | 23619990 CASP8  |
| 26   | 7.8  | 0 Unmethylated | 23619990 CASP8  |
| 27   | 7.8  | 0 Unmethylated | 23619990 CASP8  |
| 28   | 7.8  | 0 Unmethylated | 23619990 CASP8  |
| 29   | 7.8  | 0 Unmethylated | 23619990 CASP8  |
| 30   | 7.8  | 0 Unmethylated | 23619990 CASP8  |
| 31   | 7.8  | 0 Unmethylated | 23619990 CASP8  |
| 32   | 7.8  | 0 Unmethylated | 23619990 CASP8  |
| 33   | 7.8  | 0 Unmethylated | 23619990 CASP8  |
| 34   | 7.8  | 0 Unmethylated | 23619990 CASP8  |
| 35   | 7.8  | 0 Unmethylated | 23619990 CASP8  |
| 36   | 7.8  | 0 Unmethylated | 23619990 CASP8  |
| 37   | 7.8  | 0 Unmethylated | 23619990 CASP8  |



|    |     |                |                |
|----|-----|----------------|----------------|
| 38 | 7.8 | 0 Unmethylated | 23619990 CASP8 |
| 39 | 7.8 | 0 Unmethylated | 23619990 CASP8 |
| 40 | 7.8 | 0 Unmethylated | 23619990 CASP8 |
| 41 | 7.8 | 0 Unmethylated | 23619990 CASP8 |
| 42 | 7.8 | 0 Unmethylated | 23619990 CASP8 |
| 43 | 7.8 | 0 Unmethylated | 23619990 CASP8 |
| 44 | 7.8 | 0 Unmethylated | 23619990 CASP8 |
| 45 | 7.8 | 0 Unmethylated | 23619990 CASP8 |
| 46 | 7.8 | 0 Unmethylated | 23619990 CASP8 |
| 47 | 7.8 | 0 Unmethylated | 23619990 CASP8 |
| 48 | 7.8 | 0 Unmethylated | 23619990 CASP8 |
| 49 | 7.8 | 0 Unmethylated | 23619990 CASP8 |
| 50 | 7.8 | 0 Unmethylated | 23619990 CASP8 |
| 51 | 7.8 | 0 Unmethylated | 23619990 CASP8 |
| 52 | 7.8 | 0 Unmethylated | 23619990 CASP8 |
| 53 | 7.8 | 0 Unmethylated | 23619990 CASP8 |
| 54 | 7.8 | 0 Unmethylated | 23619990 CASP8 |
| 55 | 7.8 | 0 Unmethylated | 23619990 CASP8 |
| 56 | 7.8 | 0 Unmethylated | 23619990 CASP8 |
| 57 | 7.8 | 0 Unmethylated | 23619990 CASP8 |
| 58 | 7.8 | 0 Unmethylated | 23619990 CASP8 |
| 59 | 7.8 | 0 Unmethylated | 23619990 CASP8 |
| 60 | 7.8 | 0 Unmethylated | 23619990 CASP8 |
| 61 | 7.8 | 0 Unmethylated | 23619990 CASP8 |
| 62 | 7.8 | 0 Unmethylated | 23619990 CASP8 |
| 63 | 7.8 | 0 Unmethylated | 23619990 CASP8 |
| 64 | 7.8 | 0 Unmethylated | 23619990 CASP8 |
| 65 | 7.8 | 0 Unmethylated | 23619990 CASP8 |
| 66 | 7.8 | 0 Unmethylated | 23619990 CASP8 |
| 67 | 7.8 | 0 Unmethylated | 23619990 CASP8 |
| 68 | 7.8 | 0 Unmethylated | 23619990 CASP8 |
| 69 | 7.8 | 0 Unmethylated | 23619990 CASP8 |
| 70 | 7.8 | 0 Unmethylated | 23619990 CASP8 |
| 71 | 7.8 | 0 Unmethylated | 23619990 CASP8 |
| 72 | 7.8 | 0 Unmethylated | 23619990 CASP8 |
| 73 | 7.8 | 0 Unmethylated | 23619990 CASP8 |
| 74 | 7.8 | 0 Unmethylated | 23619990 CASP8 |
| 75 | 7.8 | 0 Unmethylated | 23619990 CASP8 |
| 76 | 7.8 | 0 Unmethylated | 23619990 CASP8 |
| 77 | 7.8 | 0 Unmethylated | 23619990 CASP8 |
| 78 | 7.8 | 0 Unmethylated | 23619990 CASP8 |
| 79 | 7.8 | 0 Unmethylated | 23619990 CASP8 |
| 80 | 7.8 | 0 Unmethylated | 23619990 CASP8 |
| 81 | 7.8 | 0 Unmethylated | 23619990 CASP8 |
| 82 | 7.8 | 0 Unmethylated | 23619990 CASP8 |
| 83 | 7.8 | 0 Unmethylated | 23619990 CASP8 |
| 84 | 7.8 | 0 Unmethylated | 23619990 CASP8 |

|     |      |                |                 |
|-----|------|----------------|-----------------|
| 85  | 7.8  | 0 Unmethylated | 23619990 CASP8  |
| 86  | 7.8  | 0 Unmethylated | 23619990 CASP8  |
| 87  | 7.8  | 0 Unmethylated | 23619990 CASP8  |
| 88  | 7.8  | 0 Unmethylated | 23619990 CASP8  |
| 89  | 7.8  | 0 Unmethylated | 23619990 CASP8  |
| 90  | 7.8  | 0 Unmethylated | 23619990 CASP8  |
| 91  | 7.8  | 0 Unmethylated | 23619990 CASP8  |
| 92  | 7.8  | 0 Unmethylated | 23619990 CASP8  |
| 93  | 7.8  | 0 Unmethylated | 23619990 CASP8  |
| 94  | 7.8  | 0 Unmethylated | 23619990 CASP8  |
| 95  | 7.8  | 0 Unmethylated | 23619990 CASP8  |
| 96  | 7.8  | 0 Unmethylated | 23619990 CASP8  |
| 97  | 7.8  | 0 Unmethylated | 23619990 CASP8  |
| 98  | 7.8  | 0 Unmethylated | 23619990 CASP8  |
| 99  | 7.8  | 0 Unmethylated | 23619990 CASP8  |
| 100 | 7.8  | 0 Unmethylated | 23619990 CASP8  |
| 101 | 7.8  | 0 Unmethylated | 23619990 CASP8  |
| 102 | 7.8  | 0 Unmethylated | 23619990 CASP8  |
| 103 | 7.8  | 0 Unmethylated | 23619990 CASP8  |
| 104 | 7.8  | 0 Unmethylated | 23619990 CASP8  |
| 105 | 7.8  | 0 Unmethylated | 23619990 CASP8  |
| 106 | 7.8  | 0 Unmethylated | 23619990 CASP8  |
| 107 | 7.8  | 0 Unmethylated | 23619990 CASP8  |
| 108 | 7.8  | 0 Unmethylated | 23619990 CASP8  |
| 109 | 7.8  | 0 Unmethylated | 23619990 CASP8  |
| 110 | 7.8  | 0 Unmethylated | 23619990 CASP8  |
| 111 | 7.8  | 0 Unmethylated | 23619990 CASP8  |
| 112 | 7.8  | 0 Unmethylated | 23619990 CASP8  |
| 113 | 7.8  | 0 Unmethylated | 23619990 CASP8  |
| 114 | 7.8  | 0 Unmethylated | 23619990 CASP8  |
| 348 | 7.88 | 0 Methylated   | 17570703 RASSF1 |
| 357 | 7.88 | 0 Methylated   | 17570703 RASSF1 |
| 367 | 7.88 | 0 Methylated   | 17570703 RASSF1 |
| 377 | 7.88 | 0 Methylated   | 17570703 RASSF1 |
| 387 | 7.88 | 0 Methylated   | 17570703 RASSF1 |
| 397 | 7.88 | 0 Methylated   | 17570703 RASSF1 |
| 403 | 7.88 | 0 Methylated   | 17570703 RASSF1 |
| 438 | 7.88 | 0 Methylated   | 17570703 RASSF1 |
| 443 | 7.88 | 0 Methylated   | 17570703 RASSF1 |
| 453 | 7.88 | 0 Methylated   | 17570703 RASSF1 |
| 463 | 7.88 | 0 Methylated   | 17570703 RASSF1 |
| 473 | 7.88 | 0 Methylated   | 17570703 RASSF1 |
| 483 | 7.88 | 0 Methylated   | 17570703 RASSF1 |
| 493 | 7.88 | 0 Methylated   | 17570703 RASSF1 |
| 503 | 7.88 | 0 Methylated   | 17570703 RASSF1 |
| 536 | 7.88 | 0 Methylated   | 17570703 RASSF1 |
| 542 | 7.88 | 0 Methylated   | 17570703 RASSF1 |

|      |      |                |                 |
|------|------|----------------|-----------------|
| 552  | 7.88 | 0 Methylated   | 17570703 RASSF1 |
| 562  | 7.88 | 0 Methylated   | 17570703 RASSF1 |
| 572  | 7.88 | 0 Methylated   | 17570703 RASSF1 |
| 582  | 7.88 | 0 Methylated   | 17570703 RASSF1 |
| 592  | 7.88 | 0 Methylated   | 17570703 RASSF1 |
| 2018 | 7.88 | 0 Methylated   | 17570703 RASSF1 |
| 2124 | 7.88 | 0 Methylated   | 17570703 RASSF1 |
| 2221 | 7.88 | 0 Methylated   | 17570703 RASSF1 |
| 2319 | 7.88 | 0 Methylated   | 17570703 RASSF1 |
| 2417 | 7.88 | 0 Methylated   | 17570703 RASSF1 |
| 2515 | 7.88 | 0 Methylated   | 17570703 RASSF1 |
| 2614 | 7.88 | 0 Methylated   | 17570703 RASSF1 |
| 2713 | 7.88 | 0 Methylated   | 17570703 RASSF1 |
| 2813 | 7.88 | 0 Methylated   | 17570703 RASSF1 |
| 2913 | 7.88 | 0 Methylated   | 17570703 RASSF1 |
| 3012 | 7.88 | 0 Methylated   | 17570703 RASSF1 |
| 3117 | 7.88 | 0 Methylated   | 17570703 RASSF1 |
| 3214 | 7.88 | 0 Methylated   | 17570703 RASSF1 |
| 3311 | 7.88 | 0 Methylated   | 17570703 RASSF1 |
| 4110 | 7.88 | 0 Methylated   | 17570703 RASSF1 |
| 4210 | 7.88 | 0 Methylated   | 17570703 RASSF1 |
| 5110 | 7.88 | 0 Methylated   | 17570703 RASSF1 |
| 5210 | 7.88 | 0 Methylated   | 17570703 RASSF1 |
| 180  | 7.88 | 0 Unmethylated | 17570703 RASSF1 |
| 238  | 7.88 | 0 Unmethylated | 17570703 RASSF1 |
| 326  | 7.88 | 0 Unmethylated | 17570703 RASSF1 |
| 1914 | 8.5  | 1 Methylated   | 15623630 RASSF1 |
| 2014 | 8.5  | 1 Methylated   | 15623630 RASSF1 |
| 115  | 8.5  | 0 Unmethylated | 23619990 CASP8  |
| 116  | 8.5  | 0 Unmethylated | 23619990 CASP8  |
| 117  | 8.5  | 0 Unmethylated | 23619990 CASP8  |
| 118  | 8.5  | 0 Unmethylated | 23619990 CASP8  |
| 119  | 8.5  | 0 Unmethylated | 23619990 CASP8  |
| 120  | 8.5  | 0 Unmethylated | 23619990 CASP8  |
| 121  | 8.5  | 0 Unmethylated | 23619990 CASP8  |
| 122  | 8.5  | 0 Unmethylated | 23619990 CASP8  |
| 231  | 8.5  | 0 Unmethylated | 23619990 CASP8  |
| 241  | 8.5  | 0 Unmethylated | 23619990 CASP8  |
| 251  | 8.5  | 0 Unmethylated | 23619990 CASP8  |
| 261  | 8.5  | 0 Unmethylated | 23619990 CASP8  |
| 271  | 8.5  | 0 Unmethylated | 23619990 CASP8  |
| 281  | 8.5  | 0 Unmethylated | 23619990 CASP8  |
| 291  | 8.5  | 0 Unmethylated | 23619990 CASP8  |
| 301  | 8.5  | 0 Unmethylated | 23619990 CASP8  |
| 311  | 8.5  | 0 Unmethylated | 23619990 CASP8  |
| 321  | 8.5  | 0 Unmethylated | 23619990 CASP8  |
| 331  | 8.5  | 0 Unmethylated | 23619990 CASP8  |

|     |     |                |                |
|-----|-----|----------------|----------------|
| 341 | 8.5 | 0 Unmethylated | 23619990 CASP8 |
| 351 | 8.5 | 0 Unmethylated | 23619990 CASP8 |
| 361 | 8.5 | 0 Unmethylated | 23619990 CASP8 |
| 371 | 8.5 | 0 Unmethylated | 23619990 CASP8 |
| 381 | 8.5 | 0 Unmethylated | 23619990 CASP8 |
| 391 | 8.5 | 0 Unmethylated | 23619990 CASP8 |
| 401 | 8.5 | 0 Unmethylated | 23619990 CASP8 |
| 411 | 8.5 | 0 Unmethylated | 23619990 CASP8 |
| 421 | 8.5 | 0 Unmethylated | 23619990 CASP8 |
| 431 | 8.5 | 0 Unmethylated | 23619990 CASP8 |
| 441 | 8.5 | 0 Unmethylated | 23619990 CASP8 |
| 451 | 8.5 | 0 Unmethylated | 23619990 CASP8 |
| 461 | 8.5 | 0 Unmethylated | 23619990 CASP8 |
| 471 | 8.5 | 0 Unmethylated | 23619990 CASP8 |
| 481 | 8.5 | 0 Unmethylated | 23619990 CASP8 |
| 491 | 8.5 | 0 Unmethylated | 23619990 CASP8 |
| 501 | 8.5 | 0 Unmethylated | 23619990 CASP8 |
| 511 | 8.5 | 0 Unmethylated | 23619990 CASP8 |
| 521 | 8.5 | 0 Unmethylated | 23619990 CASP8 |
| 531 | 8.5 | 0 Unmethylated | 23619990 CASP8 |
| 541 | 8.5 | 0 Unmethylated | 23619990 CASP8 |
| 551 | 8.5 | 0 Unmethylated | 23619990 CASP8 |
| 561 | 8.5 | 0 Unmethylated | 23619990 CASP8 |
| 571 | 8.5 | 0 Unmethylated | 23619990 CASP8 |
| 581 | 8.5 | 0 Unmethylated | 23619990 CASP8 |
| 591 | 8.5 | 0 Unmethylated | 23619990 CASP8 |
| 601 | 8.5 | 0 Unmethylated | 23619990 CASP8 |
| 611 | 8.5 | 0 Unmethylated | 23619990 CASP8 |
| 621 | 8.5 | 0 Unmethylated | 23619990 CASP8 |
| 631 | 8.5 | 0 Unmethylated | 23619990 CASP8 |
| 641 | 8.5 | 0 Unmethylated | 23619990 CASP8 |
| 651 | 8.5 | 0 Unmethylated | 23619990 CASP8 |
| 661 | 8.5 | 0 Unmethylated | 23619990 CASP8 |
| 671 | 8.5 | 0 Unmethylated | 23619990 CASP8 |
| 681 | 8.5 | 0 Unmethylated | 23619990 CASP8 |
| 691 | 8.5 | 0 Unmethylated | 23619990 CASP8 |
| 701 | 8.5 | 0 Unmethylated | 23619990 CASP8 |
| 711 | 8.5 | 0 Unmethylated | 23619990 CASP8 |
| 721 | 8.5 | 0 Unmethylated | 23619990 CASP8 |
| 731 | 8.5 | 0 Unmethylated | 23619990 CASP8 |
| 741 | 8.5 | 0 Unmethylated | 23619990 CASP8 |
| 751 | 8.5 | 0 Unmethylated | 23619990 CASP8 |
| 761 | 8.5 | 0 Unmethylated | 23619990 CASP8 |
| 771 | 8.5 | 0 Unmethylated | 23619990 CASP8 |
| 781 | 8.5 | 0 Unmethylated | 23619990 CASP8 |
| 791 | 8.5 | 0 Unmethylated | 23619990 CASP8 |
| 801 | 8.5 | 0 Unmethylated | 23619990 CASP8 |

|      |      |                |                |
|------|------|----------------|----------------|
| 811  | 8.5  | 0 Unmethylated | 23619990 CASP8 |
| 821  | 8.5  | 0 Unmethylated | 23619990 CASP8 |
| 831  | 8.5  | 0 Unmethylated | 23619990 CASP8 |
| 841  | 8.5  | 0 Unmethylated | 23619990 CASP8 |
| 851  | 8.5  | 0 Unmethylated | 23619990 CASP8 |
| 861  | 8.5  | 0 Unmethylated | 23619990 CASP8 |
| 871  | 8.5  | 0 Unmethylated | 23619990 CASP8 |
| 881  | 8.5  | 0 Unmethylated | 23619990 CASP8 |
| 891  | 8.5  | 0 Unmethylated | 23619990 CASP8 |
| 901  | 8.5  | 0 Unmethylated | 23619990 CASP8 |
| 911  | 8.5  | 0 Unmethylated | 23619990 CASP8 |
| 921  | 8.5  | 0 Unmethylated | 23619990 CASP8 |
| 931  | 8.5  | 0 Unmethylated | 23619990 CASP8 |
| 941  | 8.5  | 0 Unmethylated | 23619990 CASP8 |
| 951  | 8.5  | 0 Unmethylated | 23619990 CASP8 |
| 961  | 8.5  | 0 Unmethylated | 23619990 CASP8 |
| 971  | 8.5  | 0 Unmethylated | 23619990 CASP8 |
| 981  | 8.5  | 0 Unmethylated | 23619990 CASP8 |
| 991  | 8.5  | 0 Unmethylated | 23619990 CASP8 |
| 1001 | 8.5  | 0 Unmethylated | 23619990 CASP8 |
| 1011 | 8.5  | 0 Unmethylated | 23619990 CASP8 |
| 1021 | 8.5  | 0 Unmethylated | 23619990 CASP8 |
| 1031 | 8.5  | 0 Unmethylated | 23619990 CASP8 |
| 1041 | 8.5  | 0 Unmethylated | 23619990 CASP8 |
| 1051 | 8.5  | 0 Unmethylated | 23619990 CASP8 |
| 1061 | 8.5  | 0 Unmethylated | 23619990 CASP8 |
| 1071 | 8.5  | 0 Unmethylated | 23619990 CASP8 |
| 1081 | 8.5  | 0 Unmethylated | 23619990 CASP8 |
| 1091 | 8.5  | 0 Unmethylated | 23619990 CASP8 |
| 1101 | 8.5  | 0 Unmethylated | 23619990 CASP8 |
| 1111 | 8.5  | 0 Unmethylated | 23619990 CASP8 |
| 1121 | 8.5  | 0 Unmethylated | 23619990 CASP8 |
| 1131 | 8.5  | 0 Unmethylated | 23619990 CASP8 |
| 1141 | 8.5  | 0 Unmethylated | 23619990 CASP8 |
| 248  | 11   | 1 Methylated   | 23619990 CASP8 |
| 257  | 11   | 1 Methylated   | 23619990 CASP8 |
| 266  | 11   | 1 Methylated   | 23619990 CASP8 |
| 275  | 11   | 1 Methylated   | 23619990 CASP8 |
| 285  | 11   | 1 Methylated   | 23619990 CASP8 |
| 295  | 11   | 1 Methylated   | 23619990 CASP8 |
| 304  | 11   | 0 Methylated   | 23619990 CASP8 |
| 1910 | 11   | 1 Methylated   | 23619990 CASP8 |
| 2010 | 11   | 1 Methylated   | 23619990 CASP8 |
| 2116 | 11   | 1 Methylated   | 23619990 CASP8 |
| 2213 | 11   | 1 Methylated   | 23619990 CASP8 |
| 2311 | 11   | 1 Methylated   | 23619990 CASP8 |
| 269  | 11.1 | 0 Methylated   | 21104989 CASP8 |

|      |      |                |                 |
|------|------|----------------|-----------------|
| 278  | 11.1 | 0 Methylated   | 21104989 CASP8  |
| 288  | 11.1 | 0 Methylated   | 21104989 CASP8  |
| 298  | 11.1 | 0 Methylated   | 21104989 CASP8  |
| 307  | 11.1 | 0 Methylated   | 21104989 CASP8  |
| 1223 | 11.1 | 0 Methylated   | 21104989 CASP8  |
| 1319 | 11.1 | 0 Methylated   | 21104989 CASP8  |
| 1418 | 11.1 | 0 Methylated   | 21104989 CASP8  |
| 1517 | 11.1 | 0 Methylated   | 21104989 CASP8  |
| 1617 | 11.1 | 0 Methylated   | 21104989 CASP8  |
| 1716 | 11.1 | 0 Methylated   | 21104989 CASP8  |
| 1814 | 11.1 | 0 Methylated   | 21104989 CASP8  |
| 1913 | 11.1 | 0 Methylated   | 21104989 CASP8  |
| 2013 | 11.1 | 0 Methylated   | 21104989 CASP8  |
| 2119 | 11.1 | 0 Methylated   | 21104989 CASP8  |
| 2216 | 11.1 | 0 Methylated   | 21104989 CASP8  |
| 2314 | 11.1 | 0 Methylated   | 21104989 CASP8  |
| 2412 | 11.1 | 0 Methylated   | 21104989 CASP8  |
| 2510 | 11.1 | 0 Methylated   | 21104989 CASP8  |
| 3112 | 11.1 | 0 Methylated   | 21104989 CASP8  |
| 128  | 13.5 | 0 Unmethylated | 15623630 RASSF1 |
| 133  | 13.5 | 0 Unmethylated | 15623630 RASSF1 |
| 143  | 13.5 | 0 Unmethylated | 15623630 RASSF1 |
| 153  | 13.5 | 0 Unmethylated | 15623630 RASSF1 |
| 163  | 13.5 | 0 Unmethylated | 15623630 RASSF1 |
| 172  | 13.5 | 0 Unmethylated | 15623630 RASSF1 |
| 213  | 13.5 | 0 Unmethylated | 15623630 RASSF1 |
| 313  | 13.5 | 0 Unmethylated | 15623630 RASSF1 |
| 413  | 13.5 | 0 Unmethylated | 15623630 RASSF1 |
| 513  | 13.5 | 0 Unmethylated | 15623630 RASSF1 |
| 613  | 13.5 | 0 Unmethylated | 15623630 RASSF1 |
| 713  | 13.5 | 0 Unmethylated | 15623630 RASSF1 |
| 813  | 13.5 | 0 Unmethylated | 15623630 RASSF1 |
| 913  | 13.5 | 0 Unmethylated | 15623630 RASSF1 |
| 1013 | 13.5 | 0 Unmethylated | 15623630 RASSF1 |
| 1113 | 13.5 | 0 Unmethylated | 15623630 RASSF1 |
| 189  | 14.8 | 0 Unmethylated | 21104989 CASP8  |
| 198  | 14.8 | 0 Unmethylated | 21104989 CASP8  |
| 208  | 14.8 | 0 Unmethylated | 21104989 CASP8  |
| 230  | 14.8 | 0 Unmethylated | 21104989 CASP8  |
| 237  | 14.8 | 0 Unmethylated | 21104989 CASP8  |
| 246  | 14.8 | 0 Unmethylated | 21104989 CASP8  |
| 255  | 14.8 | 0 Unmethylated | 21104989 CASP8  |
| 264  | 14.8 | 0 Unmethylated | 21104989 CASP8  |
| 273  | 14.8 | 0 Unmethylated | 21104989 CASP8  |
| 283  | 14.8 | 0 Unmethylated | 21104989 CASP8  |
| 293  | 14.8 | 0 Unmethylated | 21104989 CASP8  |
| 325  | 14.8 | 0 Unmethylated | 21104989 CASP8  |

|      |      |                |                 |
|------|------|----------------|-----------------|
| 425  | 14.8 | 0 Unmethylated | 21104989 CASP8  |
| 524  | 14.8 | 0 Unmethylated | 21104989 CASP8  |
| 623  | 14.8 | 0 Unmethylated | 21104989 CASP8  |
| 723  | 14.8 | 0 Unmethylated | 21104989 CASP8  |
| 823  | 14.8 | 0 Unmethylated | 21104989 CASP8  |
| 923  | 14.8 | 0 Unmethylated | 21104989 CASP8  |
| 1023 | 14.8 | 0 Unmethylated | 21104989 CASP8  |
| 1123 | 14.8 | 0 Unmethylated | 21104989 CASP8  |
| 1218 | 14.8 | 0 Unmethylated | 21104989 CASP8  |
| 1314 | 14.8 | 0 Unmethylated | 21104989 CASP8  |
| 1413 | 14.8 | 0 Unmethylated | 21104989 CASP8  |
| 1512 | 14.8 | 0 Unmethylated | 21104989 CASP8  |
| 1612 | 14.8 | 0 Unmethylated | 21104989 CASP8  |
| 1711 | 14.8 | 0 Unmethylated | 21104989 CASP8  |
| 2114 | 14.8 | 0 Unmethylated | 21104989 CASP8  |
| 2211 | 14.8 | 0 Unmethylated | 21104989 CASP8  |
| 279  | 16.1 | 0 Methylated   | 15623630 RASSF1 |
| 289  | 16.1 | 0 Methylated   | 15623630 RASSF1 |
| 299  | 16.1 | 0 Methylated   | 15623630 RASSF1 |
| 308  | 16.1 | 0 Methylated   | 15623630 RASSF1 |
| 335  | 16.1 | 0 Methylated   | 15623630 RASSF1 |
| 343  | 16.1 | 0 Methylated   | 15623630 RASSF1 |
| 353  | 16.1 | 0 Methylated   | 15623630 RASSF1 |
| 363  | 16.1 | 0 Methylated   | 15623630 RASSF1 |
| 373  | 16.1 | 0 Methylated   | 15623630 RASSF1 |
| 383  | 16.1 | 0 Methylated   | 15623630 RASSF1 |
| 393  | 16.1 | 0 Methylated   | 15623630 RASSF1 |
| 2120 | 16.1 | 0 Methylated   | 15623630 RASSF1 |
| 2217 | 16.1 | 0 Methylated   | 15623630 RASSF1 |
| 2315 | 16.1 | 0 Methylated   | 15623630 RASSF1 |
| 2413 | 16.1 | 0 Methylated   | 15623630 RASSF1 |
| 2511 | 16.1 | 0 Methylated   | 15623630 RASSF1 |
| 2610 | 16.1 | 0 Methylated   | 15623630 RASSF1 |
| 3113 | 16.1 | 0 Methylated   | 15623630 RASSF1 |
| 3210 | 16.1 | 0 Methylated   | 15623630 RASSF1 |
| 159  | 16.9 | 0 Methylated   | 18980997 DCR2   |
| 169  | 16.9 | 0 Methylated   | 18980997 DCR2   |
| 178  | 16.9 | 0 Methylated   | 18980997 DCR2   |
| 186  | 16.9 | 0 Methylated   | 18980997 DCR2   |
| 195  | 16.9 | 0 Methylated   | 18980997 DCR2   |
| 205  | 16.9 | 0 Methylated   | 18980997 DCR2   |
| 226  | 16.9 | 0 Methylated   | 18980997 DCR2   |
| 234  | 16.9 | 0 Methylated   | 18980997 DCR2   |
| 243  | 16.9 | 0 Methylated   | 18980997 DCR2   |
| 1215 | 16.9 | 0 Methylated   | 18980997 DCR2   |
| 1311 | 16.9 | 0 Methylated   | 18980997 DCR2   |
| 1410 | 16.9 | 0 Methylated   | 18980997 DCR2   |

|      |      |                |               |
|------|------|----------------|---------------|
| 2111 | 16.9 | 0 Methylated   | 18980997 DCR2 |
| 358  | 22.9 | 0 Unmethylated | 18980997 DCR2 |
| 368  | 22.9 | 0 Unmethylated | 18980997 DCR2 |
| 378  | 22.9 | 0 Unmethylated | 18980997 DCR2 |
| 388  | 22.9 | 0 Unmethylated | 18980997 DCR2 |
| 398  | 22.9 | 0 Unmethylated | 18980997 DCR2 |
| 404  | 22.9 | 0 Unmethylated | 18980997 DCR2 |
| 444  | 22.9 | 0 Unmethylated | 18980997 DCR2 |
| 454  | 22.9 | 0 Unmethylated | 18980997 DCR2 |
| 464  | 22.9 | 0 Unmethylated | 18980997 DCR2 |
| 474  | 22.9 | 0 Unmethylated | 18980997 DCR2 |
| 484  | 22.9 | 0 Unmethylated | 18980997 DCR2 |
| 494  | 22.9 | 0 Unmethylated | 18980997 DCR2 |
| 504  | 22.9 | 0 Unmethylated | 18980997 DCR2 |
| 538  | 22.9 | 0 Unmethylated | 18980997 DCR2 |
| 543  | 22.9 | 0 Unmethylated | 18980997 DCR2 |
| 553  | 22.9 | 0 Unmethylated | 18980997 DCR2 |
| 563  | 22.9 | 0 Unmethylated | 18980997 DCR2 |
| 573  | 22.9 | 0 Unmethylated | 18980997 DCR2 |
| 583  | 22.9 | 0 Unmethylated | 18980997 DCR2 |
| 593  | 22.9 | 0 Unmethylated | 18980997 DCR2 |
| 602  | 22.9 | 0 Unmethylated | 18980997 DCR2 |
| 1035 | 22.9 | 0 Unmethylated | 18980997 DCR2 |
| 1136 | 22.9 | 0 Unmethylated | 18980997 DCR2 |
| 1229 | 22.9 | 0 Unmethylated | 18980997 DCR2 |
| 1325 | 22.9 | 0 Unmethylated | 18980997 DCR2 |
| 1424 | 22.9 | 0 Unmethylated | 18980997 DCR2 |
| 1523 | 22.9 | 0 Unmethylated | 18980997 DCR2 |
| 1623 | 22.9 | 0 Unmethylated | 18980997 DCR2 |
| 1722 | 22.9 | 0 Unmethylated | 18980997 DCR2 |
| 1820 | 22.9 | 0 Unmethylated | 18980997 DCR2 |
| 1919 | 22.9 | 0 Unmethylated | 18980997 DCR2 |
| 2019 | 22.9 | 0 Unmethylated | 18980997 DCR2 |
| 2125 | 22.9 | 0 Unmethylated | 18980997 DCR2 |
| 2222 | 22.9 | 0 Unmethylated | 18980997 DCR2 |
| 2320 | 22.9 | 0 Unmethylated | 18980997 DCR2 |
| 2418 | 22.9 | 0 Unmethylated | 18980997 DCR2 |
| 2516 | 22.9 | 0 Unmethylated | 18980997 DCR2 |
| 2615 | 22.9 | 0 Unmethylated | 18980997 DCR2 |
| 2714 | 22.9 | 0 Unmethylated | 18980997 DCR2 |
| 2814 | 22.9 | 0 Unmethylated | 18980997 DCR2 |
| 2914 | 22.9 | 0 Unmethylated | 18980997 DCR2 |
| 3013 | 22.9 | 0 Unmethylated | 18980997 DCR2 |
| 3118 | 22.9 | 0 Unmethylated | 18980997 DCR2 |
| 3215 | 22.9 | 0 Unmethylated | 18980997 DCR2 |
| 3312 | 22.9 | 0 Unmethylated | 18980997 DCR2 |
| 3410 | 22.9 | 0 Unmethylated | 18980997 DCR2 |



|       |         |                |                |
|-------|---------|----------------|----------------|
| 4111  | 22.9    | 0 Unmethylated | 18980997 DCR2  |
| 4211  | 22.9    | 0 Unmethylated | 18980997 DCR2  |
| 4310  | 22.9    | 0 Unmethylated | 18980997 DCR2  |
| 5111  | 22.9    | 0 Unmethylated | 18980997 DCR2  |
| 5211  | 22.9    | 0 Unmethylated | 18980997 DCR2  |
| 6110  | 22.9    | 0 Unmethylated | 18980997 DCR2  |
| 6210  | 22.9    | 0 Unmethylated | 18980997 DCR2  |
| 10000 | 0       | 1 Unmethylated | 24680815 CASP8 |
| 10001 | 0       | 1 Unmethylated | 24680815 CASP8 |
| 10002 | 0.1208  | 1 Unmethylated | 24680815 CASP8 |
| 10003 | 0.2425  | 1 Unmethylated | 24680815 CASP8 |
| 10004 | 0.7025  | 1 Unmethylated | 24680815 CASP8 |
| 10005 | 0.8233  | 1 Unmethylated | 24680815 CASP8 |
| 10006 | 0.8233  | 1 Unmethylated | 24680815 CASP8 |
| 10007 | 0.8233  | 1 Unmethylated | 24680815 CASP8 |
| 10008 | 1.3833  | 1 Unmethylated | 24680815 CASP8 |
| 10009 | 1.6     | 1 Unmethylated | 24680815 CASP8 |
| 10010 | 1.6     | 1 Unmethylated | 24680815 CASP8 |
| 10011 | 3.075   | 1 Unmethylated | 24680815 CASP8 |
| 10012 | 3.075   | 1 Unmethylated | 24680815 CASP8 |
| 10013 | 3.5167  | 1 Unmethylated | 24680815 CASP8 |
| 10014 | 3.5167  | 1 Unmethylated | 24680815 CASP8 |
| 10015 | 3.7083  | 1 Unmethylated | 24680815 CASP8 |
| 10016 | 4.2917  | 1 Unmethylated | 24680815 CASP8 |
| 10017 | 4.2917  | 1 Unmethylated | 24680815 CASP8 |
| 10018 | 5.1333  | 1 Unmethylated | 24680815 CASP8 |
| 10019 | 5.1333  | 1 Unmethylated | 24680815 CASP8 |
| 10020 | 6.5667  | 1 Unmethylated | 24680815 CASP8 |
| 10021 | 6.5667  | 1 Unmethylated | 24680815 CASP8 |
| 10022 | 6.5667  | 1 Unmethylated | 24680815 CASP8 |
| 10023 | 16.0833 | 0 Unmethylated | 24680815 CASP8 |
| 10024 | 16.0833 | 0 Unmethylated | 24680815 CASP8 |
| 10025 | 16.0833 | 0 Unmethylated | 24680815 CASP8 |
| 10026 | 16.0833 | 0 Unmethylated | 24680815 CASP8 |
| 10027 | 16.0833 | 0 Unmethylated | 24680815 CASP8 |
| 10028 | 16.0833 | 0 Unmethylated | 24680815 CASP8 |
| 10029 | 16.0833 | 0 Unmethylated | 24680815 CASP8 |
| 10030 | 16.0833 | 0 Unmethylated | 24680815 CASP8 |
| 10031 | 16.0833 | 0 Unmethylated | 24680815 CASP8 |
| 10032 | 16.0833 | 0 Unmethylated | 24680815 CASP8 |
| 10033 | 16.0833 | 0 Unmethylated | 24680815 CASP8 |
| 10034 | 16.0833 | 0 Unmethylated | 24680815 CASP8 |
| 10035 | 16.0833 | 0 Unmethylated | 24680815 CASP8 |
| 10036 | 16.0833 | 0 Unmethylated | 24680815 CASP8 |
| 10037 | 16.0833 | 0 Unmethylated | 24680815 CASP8 |
| 10038 | 16.0833 | 0 Unmethylated | 24680815 CASP8 |
| 10039 | 16.0833 | 0 Unmethylated | 24680815 CASP8 |



|       |         |                |                |
|-------|---------|----------------|----------------|
| 10087 | 16.0833 | 0 Unmethylated | 24680815 CASP8 |
| 10088 | 16.0833 | 0 Unmethylated | 24680815 CASP8 |
| 10089 | 16.0833 | 0 Unmethylated | 24680815 CASP8 |
| 10090 | 16.0833 | 0 Unmethylated | 24680815 CASP8 |
| 10091 | 16.0833 | 0 Unmethylated | 24680815 CASP8 |
| 10092 | 16.0833 | 0 Unmethylated | 24680815 CASP8 |
| 10093 | 16.0833 | 0 Unmethylated | 24680815 CASP8 |
| 10094 | 16.0833 | 0 Unmethylated | 24680815 CASP8 |
| 10095 | 16.0833 | 0 Unmethylated | 24680815 CASP8 |
| 10096 | 16.0833 | 0 Unmethylated | 24680815 CASP8 |
| 10097 | 16.0833 | 0 Unmethylated | 24680815 CASP8 |
| 10098 | 16.0833 | 0 Unmethylated | 24680815 CASP8 |
| 10099 | 16.0833 | 0 Unmethylated | 24680815 CASP8 |
| 10100 | 0       | 1 Unmethylated | 24680815 DCR2  |
| 10101 | 0       | 1 Unmethylated | 24680815 DCR2  |
| 10102 | 0.2183  | 1 Unmethylated | 24680815 DCR2  |
| 10103 | 0.2183  | 1 Unmethylated | 24680815 DCR2  |
| 10104 | 0.5817  | 1 Unmethylated | 24680815 DCR2  |
| 10105 | 0.7508  | 1 Unmethylated | 24680815 DCR2  |
| 10106 | 0.7508  | 1 Unmethylated | 24680815 DCR2  |
| 10107 | 0.875   | 1 Unmethylated | 24680815 DCR2  |
| 10108 | 0.875   | 1 Unmethylated | 24680815 DCR2  |
| 10109 | 0.875   | 1 Unmethylated | 24680815 DCR2  |
| 10110 | 1.0417  | 1 Unmethylated | 24680815 DCR2  |
| 10111 | 1.0417  | 1 Unmethylated | 24680815 DCR2  |
| 10112 | 1.575   | 1 Unmethylated | 24680815 DCR2  |
| 10113 | 1.575   | 1 Unmethylated | 24680815 DCR2  |
| 10114 | 1.575   | 1 Unmethylated | 24680815 DCR2  |
| 10115 | 2.0333  | 1 Unmethylated | 24680815 DCR2  |
| 10116 | 2.0333  | 1 Unmethylated | 24680815 DCR2  |
| 10117 | 2.275   | 1 Unmethylated | 24680815 DCR2  |
| 10118 | 2.325   | 1 Unmethylated | 24680815 DCR2  |
| 10119 | 2.7167  | 1 Unmethylated | 24680815 DCR2  |
| 10120 | 4.8667  | 1 Unmethylated | 24680815 DCR2  |
| 10121 | 5.2083  | 1 Unmethylated | 24680815 DCR2  |
| 10122 | 5.8583  | 1 Unmethylated | 24680815 DCR2  |
| 10123 | 5.8583  | 1 Unmethylated | 24680815 DCR2  |
| 10124 | 5.8583  | 1 Unmethylated | 24680815 DCR2  |
| 10125 | 16.1667 | 0 Unmethylated | 24680815 DCR2  |
| 10126 | 16.1667 | 0 Unmethylated | 24680815 DCR2  |
| 10127 | 16.1667 | 0 Unmethylated | 24680815 DCR2  |
| 10128 | 16.1667 | 0 Unmethylated | 24680815 DCR2  |
| 10129 | 16.1667 | 0 Unmethylated | 24680815 DCR2  |
| 10130 | 16.1667 | 0 Unmethylated | 24680815 DCR2  |
| 10131 | 16.1667 | 0 Unmethylated | 24680815 DCR2  |
| 10132 | 16.1667 | 0 Unmethylated | 24680815 DCR2  |
| 10133 | 16.1667 | 0 Unmethylated | 24680815 DCR2  |



|       |         |                |               |
|-------|---------|----------------|---------------|
| 10181 | 16.1667 | 0 Unmethylated | 24680815 DCR2 |
| 10182 | 16.1667 | 0 Unmethylated | 24680815 DCR2 |
| 10183 | 16.1667 | 0 Unmethylated | 24680815 DCR2 |
| 10184 | 16.1667 | 0 Unmethylated | 24680815 DCR2 |
| 10185 | 16.1667 | 0 Unmethylated | 24680815 DCR2 |
| 10186 | 16.1667 | 0 Unmethylated | 24680815 DCR2 |
| 10187 | 16.1667 | 0 Unmethylated | 24680815 DCR2 |
| 10188 | 16.1667 | 0 Unmethylated | 24680815 DCR2 |
| 10189 | 16.1667 | 0 Unmethylated | 24680815 DCR2 |
| 10190 | 16.1667 | 0 Unmethylated | 24680815 DCR2 |
| 10191 | 16.1667 | 0 Unmethylated | 24680815 DCR2 |
| 10192 | 16.1667 | 0 Unmethylated | 24680815 DCR2 |
| 10193 | 16.1667 | 0 Unmethylated | 24680815 DCR2 |
| 10194 | 16.1667 | 0 Unmethylated | 24680815 DCR2 |
| 10195 | 16.1667 | 0 Unmethylated | 24680815 DCR2 |
| 10196 | 16.1667 | 0 Unmethylated | 24680815 DCR2 |
| 10197 | 16.1667 | 0 Unmethylated | 24680815 DCR2 |
| 10198 | 16.1667 | 0 Unmethylated | 24680815 DCR2 |
| 10199 | 16.1667 | 0 Unmethylated | 24680815 DCR2 |
| 10200 | 16.1667 | 0 Unmethylated | 24680815 DCR2 |
| 10201 | 16.1667 | 0 Unmethylated | 24680815 DCR2 |
| 10202 | 16.1667 | 0 Unmethylated | 24680815 DCR2 |
| 10203 | 16.1667 | 0 Unmethylated | 24680815 DCR2 |
| 10204 | 16.1667 | 0 Unmethylated | 24680815 DCR2 |
| 10205 | 16.1667 | 0 Unmethylated | 24680815 DCR2 |
| 10206 | 16.1667 | 0 Unmethylated | 24680815 DCR2 |
| 10207 | 0.7025  | 1 Methylated   | 24680815 DCR2 |
| 10208 | 0.7992  | 1 Methylated   | 24680815 DCR2 |
| 10209 | 0.9     | 1 Methylated   | 24680815 DCR2 |
| 10210 | 1.1833  | 1 Methylated   | 24680815 DCR2 |
| 10211 | 1.8667  | 1 Methylated   | 24680815 DCR2 |
| 10212 | 1.8667  | 1 Methylated   | 24680815 DCR2 |
| 10213 | 2.9333  | 1 Methylated   | 24680815 DCR2 |
| 10214 | 2.9333  | 1 Methylated   | 24680815 DCR2 |
| 10215 | 3       | 1 Methylated   | 24680815 DCR2 |
| 10216 | 3.075   | 1 Methylated   | 24680815 DCR2 |
| 10217 | 3.075   | 1 Methylated   | 24680815 DCR2 |
| 10218 | 3.5333  | 1 Methylated   | 24680815 DCR2 |
| 10219 | 3.6333  | 1 Methylated   | 24680815 DCR2 |
| 10220 | 4       | 1 Methylated   | 24680815 DCR2 |
| 10221 | 4.3083  | 1 Methylated   | 24680815 DCR2 |
| 10222 | 6.5167  | 1 Methylated   | 24680815 DCR2 |
| 10223 | 6.5167  | 1 Methylated   | 24680815 DCR2 |
| 10224 | 12      | 0 Methylated   | 24680815 DCR2 |
| 10225 | 12      | 0 Methylated   | 24680815 DCR2 |
| 10226 | 12      | 0 Methylated   | 24680815 DCR2 |
| 10227 | 12      | 0 Methylated   | 24680815 DCR2 |

|       |         |                |                 |
|-------|---------|----------------|-----------------|
| 10228 | 12      | 0 Methylated   | 24680815 DCR2   |
| 10229 | 12      | 0 Methylated   | 24680815 DCR2   |
| 10230 | 12      | 0 Methylated   | 24680815 DCR2   |
| 10231 | 12      | 0 Methylated   | 24680815 DCR2   |
| 10232 | 12      | 0 Methylated   | 24680815 DCR2   |
| 10233 | 12      | 0 Methylated   | 24680815 DCR2   |
| 10234 | 12      | 0 Methylated   | 24680815 DCR2   |
| 10235 | 12      | 0 Methylated   | 24680815 DCR2   |
| 10236 | 0.3392  | 1 Methylated   | 24680815 CASP8  |
| 10237 | 0.85    | 1 Methylated   | 24680815 CASP8  |
| 10238 | 0.9417  | 1 Methylated   | 24680815 CASP8  |
| 10239 | 0.9417  | 1 Methylated   | 24680815 CASP8  |
| 10240 | 1.0417  | 1 Methylated   | 24680815 CASP8  |
| 10241 | 1.0417  | 1 Methylated   | 24680815 CASP8  |
| 10242 | 1.2083  | 1 Methylated   | 24680815 CASP8  |
| 10243 | 1.55    | 1 Methylated   | 24680815 CASP8  |
| 10244 | 1.8167  | 1 Methylated   | 24680815 CASP8  |
| 10245 | 1.8167  | 1 Methylated   | 24680815 CASP8  |
| 10246 | 2.0833  | 1 Methylated   | 24680815 CASP8  |
| 10247 | 2.1833  | 1 Methylated   | 24680815 CASP8  |
| 10248 | 2.35    | 1 Methylated   | 24680815 CASP8  |
| 10249 | 2.9333  | 1 Methylated   | 24680815 CASP8  |
| 10250 | 2.9333  | 1 Methylated   | 24680815 CASP8  |
| 10251 | 3.05    | 1 Methylated   | 24680815 CASP8  |
| 10252 | 3.05    | 1 Methylated   | 24680815 CASP8  |
| 10253 | 4.2417  | 1 Methylated   | 24680815 CASP8  |
| 10254 | 5.9083  | 1 Methylated   | 24680815 CASP8  |
| 10255 | 5.9083  | 1 Methylated   | 24680815 CASP8  |
| 10256 | 11.9167 | 0 Methylated   | 24680815 CASP8  |
| 10257 | 11.9167 | 0 Methylated   | 24680815 CASP8  |
| 10258 | 11.9167 | 0 Methylated   | 24680815 CASP8  |
| 10259 | 11.9167 | 0 Methylated   | 24680815 CASP8  |
| 10260 | 11.9167 | 0 Methylated   | 24680815 CASP8  |
| 10261 | 11.9167 | 0 Methylated   | 24680815 CASP8  |
| 10262 | 11.9167 | 0 Methylated   | 24680815 CASP8  |
| 10263 | 11.9167 | 0 Methylated   | 24680815 CASP8  |
| 10264 | 11.9167 | 0 Methylated   | 24680815 CASP8  |
| 10265 | 11.9167 | 0 Methylated   | 24680815 CASP8  |
| 10266 | 11.9167 | 0 Methylated   | 24680815 CASP8  |
| 10267 | 11.9167 | 0 Methylated   | 24680815 CASP8  |
| 10268 | 11.9167 | 0 Methylated   | 24680815 CASP8  |
| 10269 | 11.9167 | 0 Methylated   | 24680815 CASP8  |
| 10270 | 11.9167 | 0 Methylated   | 24680815 CASP8  |
| 10271 | 11.9167 | 0 Methylated   | 24680815 CASP8  |
| 10272 | 0.9667  | 1 Unmethylated | 24680815 RASSF1 |
| 10273 | 0.9667  | 1 Unmethylated | 24680815 RASSF1 |
| 10274 | 1.5917  | 1 Unmethylated | 24680815 RASSF1 |

|       |         |   |              |          |        |
|-------|---------|---|--------------|----------|--------|
| 10275 | 1.7083  | 1 | Unmethylated | 24680815 | RASSF1 |
| 10276 | 6.5     | 1 | Unmethylated | 24680815 | RASSF1 |
| 10277 | 6.5     | 1 | Unmethylated | 24680815 | RASSF1 |
| 10278 | 6.5     | 1 | Unmethylated | 24680815 | RASSF1 |
| 10279 | 6.5     | 1 | Unmethylated | 24680815 | RASSF1 |
| 10280 | 12.9167 | 0 | Unmethylated | 24680815 | RASSF1 |
| 10281 | 12.9167 | 0 | Unmethylated | 24680815 | RASSF1 |
| 10282 | 12.9167 | 0 | Unmethylated | 24680815 | RASSF1 |
| 10283 | 12.9167 | 0 | Unmethylated | 24680815 | RASSF1 |
| 10284 | 12.9167 | 0 | Unmethylated | 24680815 | RASSF1 |
| 10285 | 12.9167 | 0 | Unmethylated | 24680815 | RASSF1 |
| 10286 | 12.9167 | 0 | Unmethylated | 24680815 | RASSF1 |
| 10287 | 12.9167 | 0 | Unmethylated | 24680815 | RASSF1 |
| 10288 | 12.9167 | 0 | Unmethylated | 24680815 | RASSF1 |
| 10289 | 12.9167 | 0 | Unmethylated | 24680815 | RASSF1 |
| 10290 | 12.9167 | 0 | Unmethylated | 24680815 | RASSF1 |
| 10291 | 12.9167 | 0 | Unmethylated | 24680815 | RASSF1 |
| 10292 | 12.9167 | 0 | Unmethylated | 24680815 | RASSF1 |
| 10293 | 12.9167 | 0 | Unmethylated | 24680815 | RASSF1 |
| 10294 | 12.9167 | 0 | Unmethylated | 24680815 | RASSF1 |
| 10295 | 12.9167 | 0 | Unmethylated | 24680815 | RASSF1 |
| 10296 | 12.9167 | 0 | Unmethylated | 24680815 | RASSF1 |
| 10297 | 12.9167 | 0 | Unmethylated | 24680815 | RASSF1 |
| 10298 | 12.9167 | 0 | Unmethylated | 24680815 | RASSF1 |
| 10299 | 12.9167 | 0 | Unmethylated | 24680815 | RASSF1 |
| 10300 | 12.9167 | 0 | Unmethylated | 24680815 | RASSF1 |
| 10301 | 12.9167 | 0 | Unmethylated | 24680815 | RASSF1 |
| 10302 | 12.9167 | 0 | Unmethylated | 24680815 | RASSF1 |
| 10303 | 12.9167 | 0 | Unmethylated | 24680815 | RASSF1 |
| 10304 | 12.9167 | 0 | Unmethylated | 24680815 | RASSF1 |
| 10305 | 12.9167 | 0 | Unmethylated | 24680815 | RASSF1 |
| 10306 | 12.9167 | 0 | Unmethylated | 24680815 | RASSF1 |
| 10307 | 12.9167 | 0 | Unmethylated | 24680815 | RASSF1 |
| 10308 | 12.9167 | 0 | Unmethylated | 24680815 | RASSF1 |
| 10309 | 12.9167 | 0 | Unmethylated | 24680815 | RASSF1 |
| 10310 | 12.9167 | 0 | Unmethylated | 24680815 | RASSF1 |
| 10311 | 12.9167 | 0 | Unmethylated | 24680815 | RASSF1 |
| 10312 | 12.9167 | 0 | Unmethylated | 24680815 | RASSF1 |
| 10313 | 12.9167 | 0 | Unmethylated | 24680815 | RASSF1 |
| 10314 | 12.9167 | 0 | Unmethylated | 24680815 | RASSF1 |
| 10315 | 12.9167 | 0 | Unmethylated | 24680815 | RASSF1 |
| 10316 | 12.9167 | 0 | Unmethylated | 24680815 | RASSF1 |
| 10317 | 12.9167 | 0 | Unmethylated | 24680815 | RASSF1 |
| 10318 | 12.9167 | 0 | Unmethylated | 24680815 | RASSF1 |
| 10319 | 12.9167 | 0 | Unmethylated | 24680815 | RASSF1 |
| 10320 | 12.9167 | 0 | Unmethylated | 24680815 | RASSF1 |
| 10321 | 12.9167 | 0 | Unmethylated | 24680815 | RASSF1 |

|       |         |                |                 |
|-------|---------|----------------|-----------------|
| 10322 | 12.9167 | 0 Unmethylated | 24680815 RASSF1 |
| 10323 | 12.9167 | 0 Unmethylated | 24680815 RASSF1 |
| 10324 | 0       | 1 Methylated   | 24680815 RASSF1 |
| 10325 | 0       | 1 Methylated   | 24680815 RASSF1 |
| 10326 | 0       | 1 Methylated   | 24680815 RASSF1 |
| 10327 | 0.3133  | 1 Methylated   | 24680815 RASSF1 |
| 10328 | 0.7467  | 1 Methylated   | 24680815 RASSF1 |
| 10329 | 0.7467  | 1 Methylated   | 24680815 RASSF1 |
| 10330 | 0.7467  | 1 Methylated   | 24680815 RASSF1 |
| 10331 | 0.7467  | 1 Methylated   | 24680815 RASSF1 |
| 10332 | 0.8917  | 1 Methylated   | 24680815 RASSF1 |
| 10333 | 0.8917  | 1 Methylated   | 24680815 RASSF1 |
| 10334 | 0.9833  | 1 Methylated   | 24680815 RASSF1 |
| 10335 | 0.9833  | 1 Methylated   | 24680815 RASSF1 |
| 10336 | 1.0583  | 1 Methylated   | 24680815 RASSF1 |
| 10337 | 1.0583  | 1 Methylated   | 24680815 RASSF1 |
| 10338 | 1.4917  | 1 Methylated   | 24680815 RASSF1 |
| 10339 | 1.7833  | 1 Methylated   | 24680815 RASSF1 |
| 10340 | 1.7833  | 1 Methylated   | 24680815 RASSF1 |
| 10341 | 2.025   | 1 Methylated   | 24680815 RASSF1 |
| 10342 | 2.025   | 1 Methylated   | 24680815 RASSF1 |
| 10343 | 2.1667  | 1 Methylated   | 24680815 RASSF1 |
| 10344 | 2.2667  | 1 Methylated   | 24680815 RASSF1 |
| 10345 | 2.9417  | 1 Methylated   | 24680815 RASSF1 |
| 10346 | 2.9417  | 1 Methylated   | 24680815 RASSF1 |
| 10347 | 3.0583  | 1 Methylated   | 24680815 RASSF1 |
| 10348 | 3.0583  | 1 Methylated   | 24680815 RASSF1 |
| 10349 | 3.0583  | 1 Methylated   | 24680815 RASSF1 |
| 10350 | 3.5167  | 1 Methylated   | 24680815 RASSF1 |
| 10351 | 3.5167  | 1 Methylated   | 24680815 RASSF1 |
| 10352 | 3.5167  | 1 Methylated   | 24680815 RASSF1 |
| 10353 | 4.2417  | 1 Methylated   | 24680815 RASSF1 |
| 10354 | 4.2417  | 1 Methylated   | 24680815 RASSF1 |
| 10355 | 4.2417  | 1 Methylated   | 24680815 RASSF1 |
| 10356 | 5.0083  | 1 Methylated   | 24680815 RASSF1 |
| 10357 | 5.85    | 1 Methylated   | 24680815 RASSF1 |
| 10358 | 5.85    | 1 Methylated   | 24680815 RASSF1 |
| 10359 | 16      | 0 Methylated   | 24680815 RASSF1 |
| 10360 | 16      | 0 Methylated   | 24680815 RASSF1 |
| 10361 | 16      | 0 Methylated   | 24680815 RASSF1 |
| 10362 | 16      | 0 Methylated   | 24680815 RASSF1 |
| 10363 | 16      | 0 Methylated   | 24680815 RASSF1 |
| 10364 | 16      | 0 Methylated   | 24680815 RASSF1 |
| 10365 | 16      | 0 Methylated   | 24680815 RASSF1 |
| 10366 | 16      | 0 Methylated   | 24680815 RASSF1 |
| 10367 | 16      | 0 Methylated   | 24680815 RASSF1 |
| 10368 | 16      | 0 Methylated   | 24680815 RASSF1 |



|       |    |              |                 |
|-------|----|--------------|-----------------|
| 10369 | 16 | 0 Methylated | 24680815 RASSF1 |
| 10370 | 16 | 0 Methylated | 24680815 RASSF1 |
| 10371 | 16 | 0 Methylated | 24680815 RASSF1 |
| 10372 | 16 | 0 Methylated | 24680815 RASSF1 |
| 10373 | 16 | 0 Methylated | 24680815 RASSF1 |
| 10374 | 16 | 0 Methylated | 24680815 RASSF1 |
| 10375 | 16 | 0 Methylated | 24680815 RASSF1 |
| 10376 | 16 | 0 Methylated | 24680815 RASSF1 |
| 10377 | 16 | 0 Methylated | 24680815 RASSF1 |
| 10378 | 16 | 0 Methylated | 24680815 RASSF1 |
| 10379 | 16 | 0 Methylated | 24680815 RASSF1 |
| 10380 | 16 | 0 Methylated | 24680815 RASSF1 |
| 10381 | 16 | 0 Methylated | 24680815 RASSF1 |
| 10382 | 16 | 0 Methylated | 24680815 RASSF1 |
| 10383 | 16 | 0 Methylated | 24680815 RASSF1 |
| 10384 | 16 | 0 Methylated | 24680815 RASSF1 |
| 10385 | 16 | 0 Methylated | 24680815 RASSF1 |
| 10386 | 16 | 0 Methylated | 24680815 RASSF1 |
| 10387 | 16 | 0 Methylated | 24680815 RASSF1 |
| 10388 | 16 | 0 Methylated | 24680815 RASSF1 |
| 10389 | 16 | 0 Methylated | 24680815 RASSF1 |
| 10390 | 16 | 0 Methylated | 24680815 RASSF1 |
| 10391 | 16 | 0 Methylated | 24680815 RASSF1 |
| 10392 | 16 | 0 Methylated | 24680815 RASSF1 |
| 10393 | 16 | 0 Methylated | 24680815 RASSF1 |
| 10394 | 16 | 0 Methylated | 24680815 RASSF1 |
| 10395 | 16 | 0 Methylated | 24680815 RASSF1 |
| 10396 | 16 | 0 Methylated | 24680815 RASSF1 |
| 10397 | 16 | 0 Methylated | 24680815 RASSF1 |
| 10398 | 16 | 0 Methylated | 24680815 RASSF1 |
| 10399 | 16 | 0 Methylated | 24680815 RASSF1 |
| 10400 | 16 | 0 Methylated | 24680815 RASSF1 |
| 10401 | 16 | 0 Methylated | 24680815 RASSF1 |
| 10402 | 16 | 0 Methylated | 24680815 RASSF1 |
| 10403 | 16 | 0 Methylated | 24680815 RASSF1 |
| 10404 | 16 | 0 Methylated | 24680815 RASSF1 |
| 10405 | 16 | 0 Methylated | 24680815 RASSF1 |
| 10406 | 16 | 0 Methylated | 24680815 RASSF1 |
| 10407 | 16 | 0 Methylated | 24680815 RASSF1 |
